# Supplementary material for: Photochromic and luminescent switchable iodoargentate hybrids directed by solvated lanthanide cations
Source: Royal Society of Chemistry journal article supplement (doi:10.1039/d0dt01548b), 2020-01-01
Supplement: d0dt01548b1.pdf [file d0dt01548b1.pdf]

Electronic Supplementary Material (ESI) for Dalton Transactions.

This journal is © The Royal Society of Chemistry 2020

## Photochromic and luminescent switchable iodoargentate hybrids directed by solvated lanthanide cations

*Electronic Supplementary Information*

Pengfei Hao\*, Weipin Wang, Junju Shen, Yunlong Fu\*

*Key Laboratory of Magnetic Molecules & Magnetic Information Materials Ministry of Education, School of Chemical and Material Science, Shanxi Normal University, Linfen 041004, China*

### Content

|                                                                                                                                                                                                                   |    |
|-------------------------------------------------------------------------------------------------------------------------------------------------------------------------------------------------------------------|----|
| <b>1. Chemical analytical experiment for photoproducts</b> .....                                                                                                                                                  | 2  |
| <b>2. Figures</b> .....                                                                                                                                                                                           | 3  |
| <b>Fig. S1</b> IR spectra of <b>1</b> (a), <b>2</b> (b), <b>3</b> (c) and <b>4</b> (d). .....                                                                                                                     | 3  |
| <b>Fig. S2</b> TG-DSC curve of <b>1</b> (a), <b>2</b> (b), <b>3</b> (c) and <b>4</b> (d). .....                                                                                                                   | 3  |
| <b>Fig. S3</b> The UV-vis absorption spectra and band gaps of <b>1</b> , <b>2</b> , <b>3</b> and <b>4</b> . .....                                                                                                 | 4  |
| <b>Fig. S4</b> The coloration process of crystals for <b>1</b> (up) and <b>4</b> (below). .....                                                                                                                   | 4  |
| <b>Fig. S5</b> The comparison of PXRD patterns of <b>1</b> and <b>1P</b> .....                                                                                                                                    | 5  |
| <b>Fig. S6</b> The comparison of PXRD patterns of <b>2</b> and <b>2P</b> .....                                                                                                                                    | 5  |
| <b>Fig. S7</b> The comparison of PXRD patterns of <b>3</b> and <b>3P</b> .....                                                                                                                                    | 6  |
| <b>Fig. S8</b> The comparison of PXRD patterns of <b>4</b> and <b>4P</b> .....                                                                                                                                    | 6  |
| <b>Fig. S9</b> The SER spectra of <b>1</b> , <b>1P</b> , <b>2</b> , <b>2P</b> , <b>3</b> , <b>3P</b> , <b>4</b> and <b>4P</b> . .....                                                                             | 7  |
| <b>Fig. S10</b> The comparison of UV-vis absorption spectra of <b>1</b> , <b>1P</b> -decolorized, <b>2</b> , <b>2P</b> -decolorized, <b>3</b> , <b>3P</b> -decolorized, <b>4</b> and <b>4P</b> -decolorized. .... | 7  |
| <b>Fig. S11</b> The switching cycles of coloration-decoloration processes of <b>1</b> , <b>2</b> , <b>3</b> and <b>4</b> upon alternating UV light irradiation and dark treatment.....                            | 8  |
| <b>Fig. S12</b> The CIE for <b>1</b> , <b>2</b> , <b>3</b> and <b>4</b> .....                                                                                                                                     | 8  |
| <b>Fig. S13</b> The comparison of coloration rate and fluorescence quenching rate of <b>1</b> (a), <b>2</b> (b), <b>3</b> (c) and <b>4</b> (d).....                                                               | 9  |
| <b>3. Tables</b> .....                                                                                                                                                                                            | 10 |
| <b>Table S1</b> Crystal data and structure refinement for compounds <b>1-4</b> . .....                                                                                                                            | 10 |
| <b>Table S2</b> Selected bond lengths (Å) and angles (°) for compounds <b>1-4</b> . .....                                                                                                                         | 12 |
| <b>Table S3</b> Synthesis conditions for compounds <b>1</b> , <b>2</b> , <b>3</b> and <b>4</b> .....                                                                                                              | 20 |

### **1. Chemical analytical experiment for photoproducts**

Dissolve 0.15 mmol powder samples of **1**, **1P**, **2**, **2P**, **3**, **3P**, **4** and **4P** in 4 ml dimethyl sulfoxide containing 1 mmol NaI and 1 mmol Na<sub>2</sub>S<sub>2</sub>O<sub>3</sub>, respectively. After several minutes, a spot of black precipitated particles are separated out in the solution of **1P-4P**, then put black precipitated particles washed, drained and treated it with concentrated HNO<sub>3</sub>, solution of NaCl and concentrated NH<sub>3</sub>·H<sub>2</sub>O in turn, which further successively confirmed as metal silver. The whole process is carried out in the dark at room temperature.

## 2. Figures

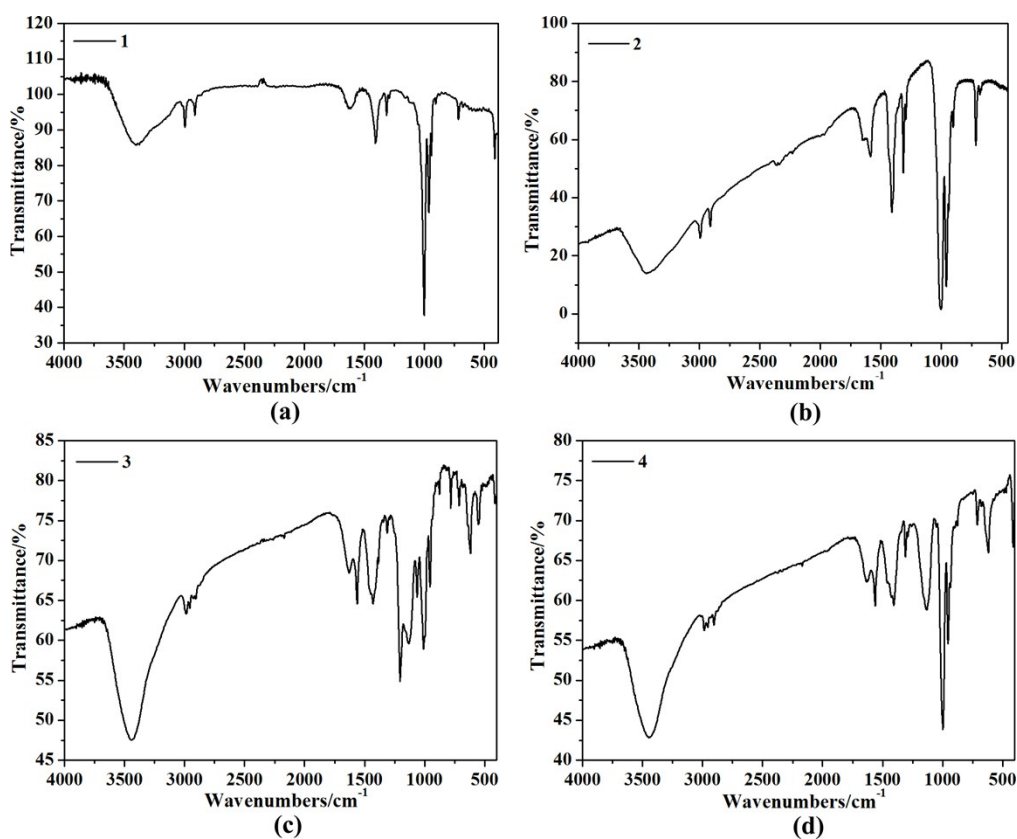

Fig. S1 IR spectra of 1 (a), 2 (b), 3 (c) and 4 (d).

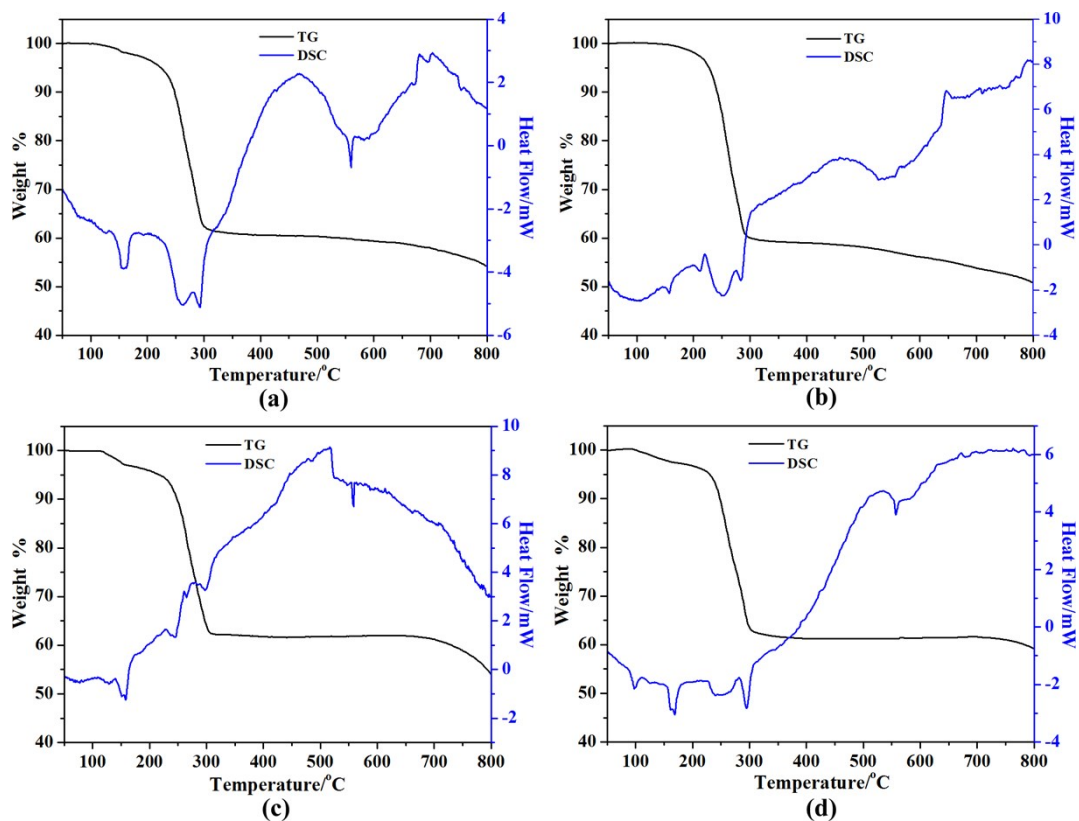

Fig. S2 TG-DSC curve of 1 (a), 2 (b), 3 (c) and 4 (d).

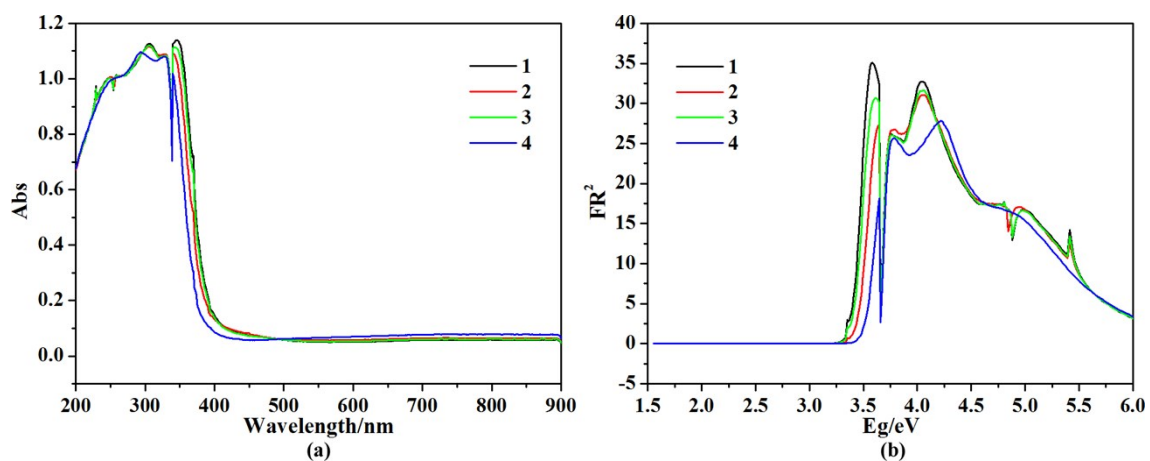

**Fig. S3** The UV-vis absorption spectra and band gaps of **1**, **2**, **3** and **4**.

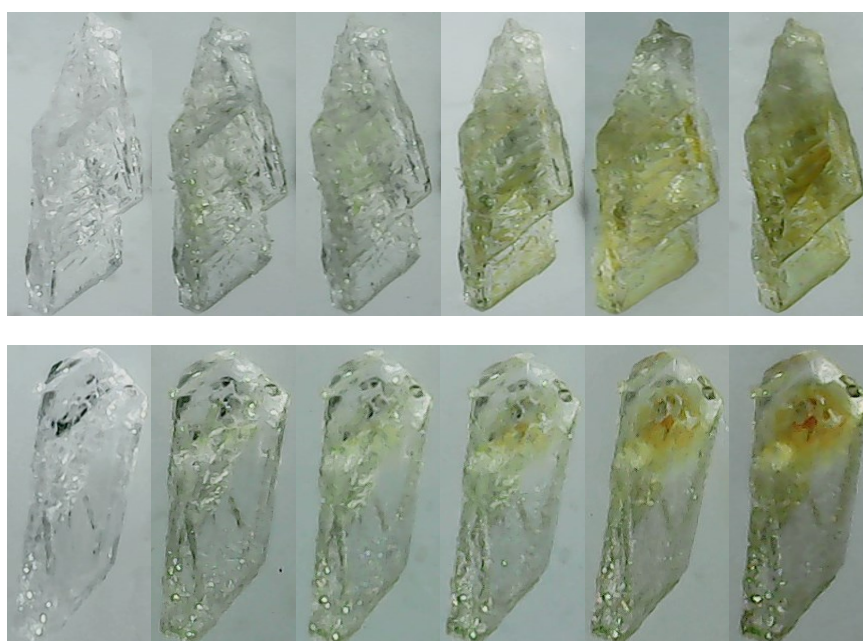

**Fig. S4** The coloration process of crystals for **1** (up) and **4** (below).

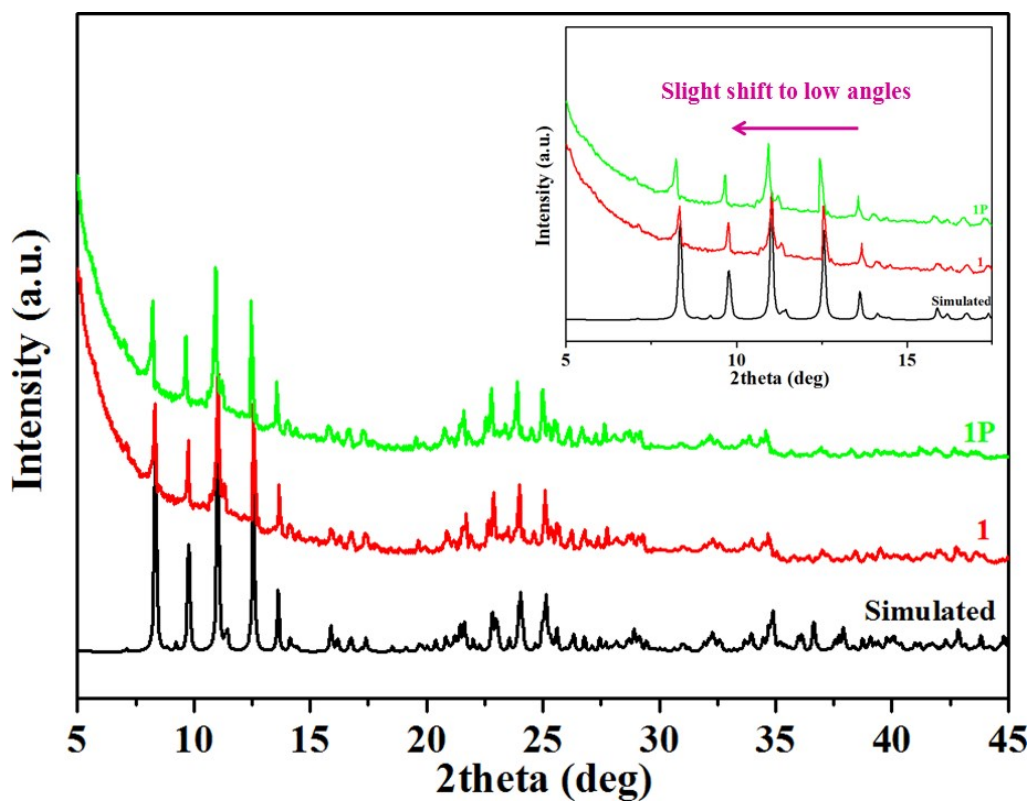

Fig. S5 The comparison of PXRD patterns of **1** and **1P**.

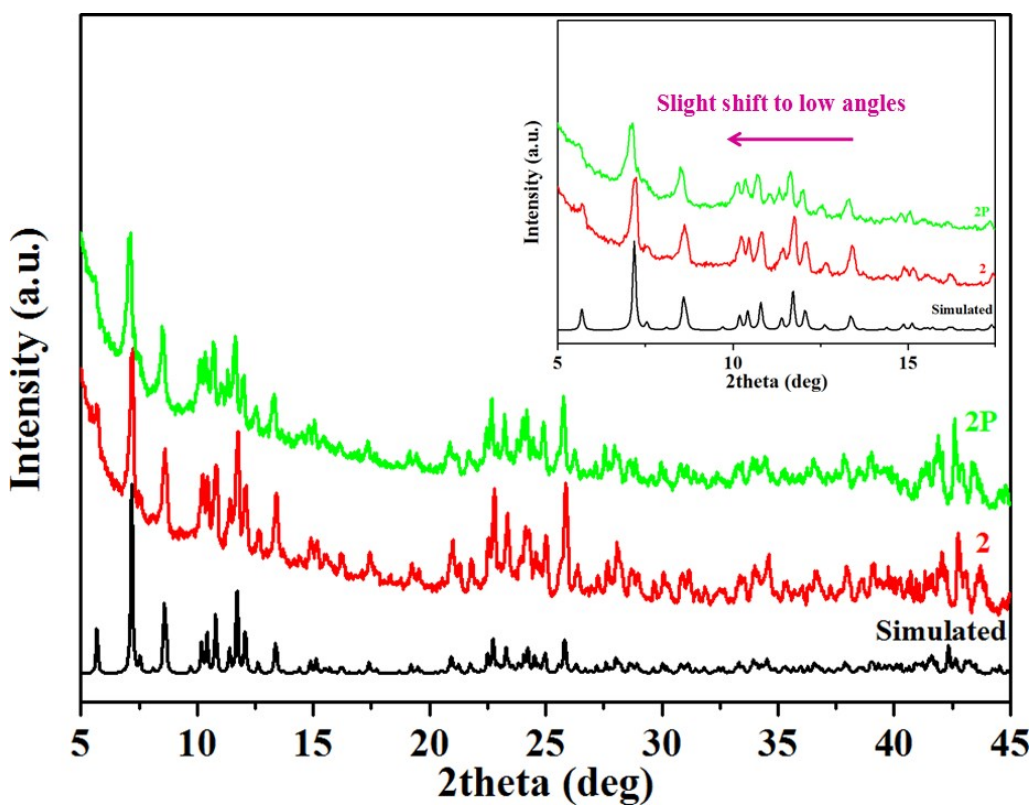

Fig. S6 The comparison of PXRD patterns of **2** and **2P**.

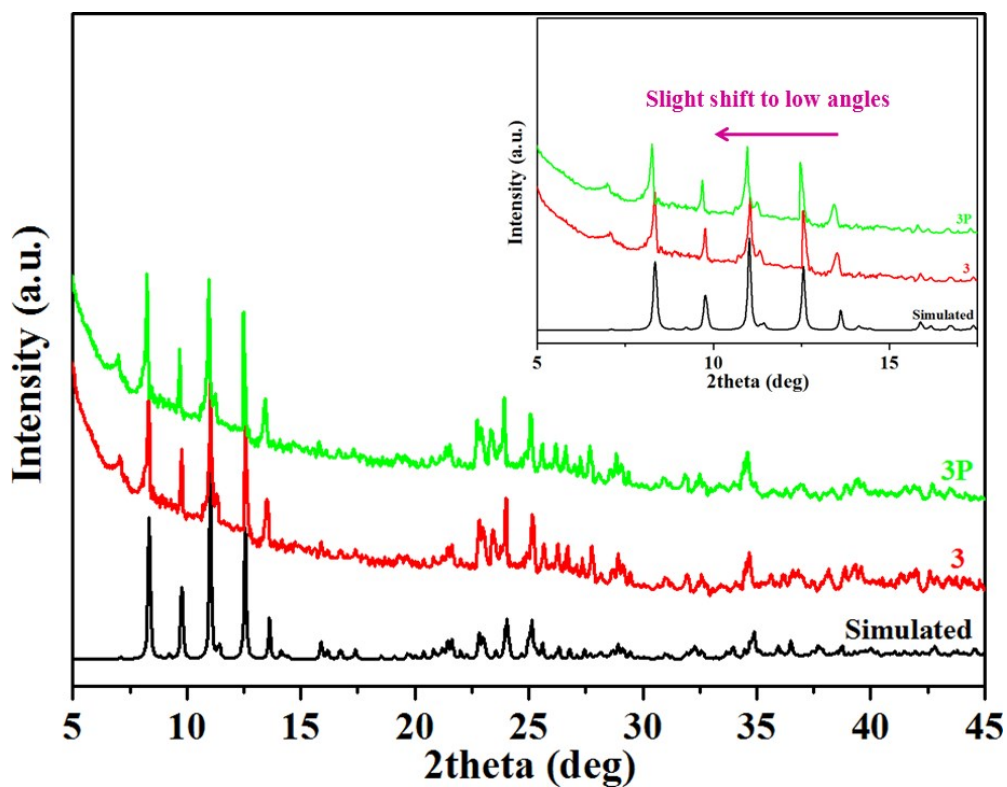

Fig. S7 The comparison of PXRD patterns of **3** and **3P**.

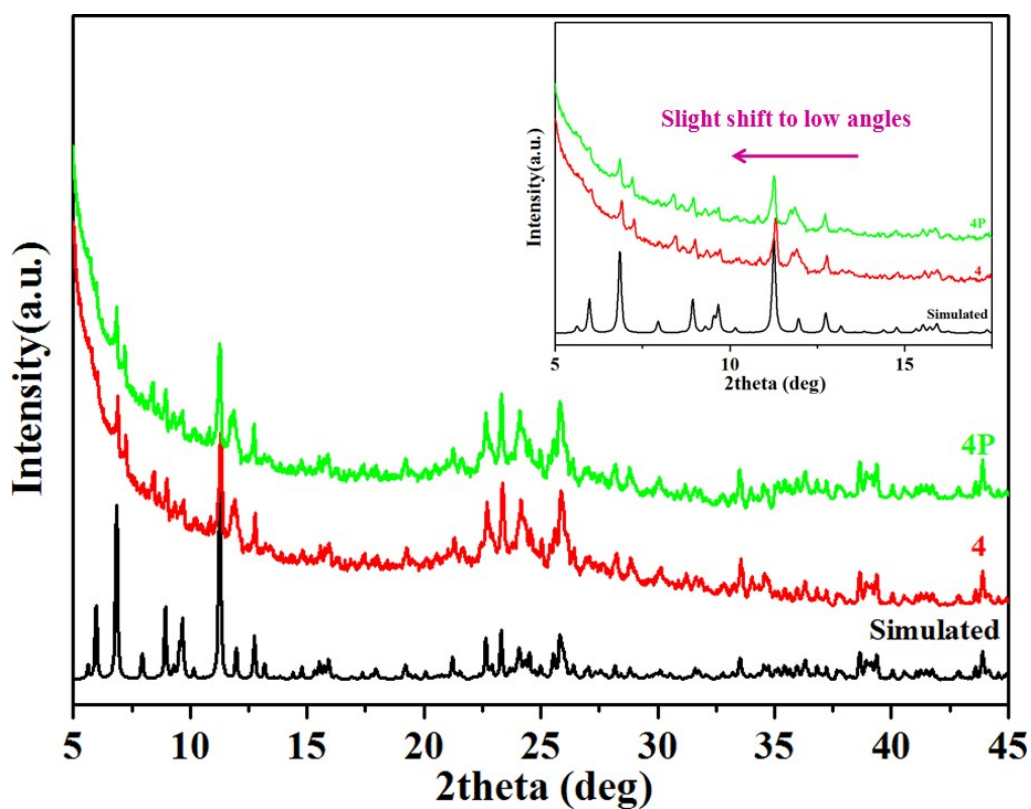

Fig. S8 The comparison of PXRD patterns of **4** and **4P**.

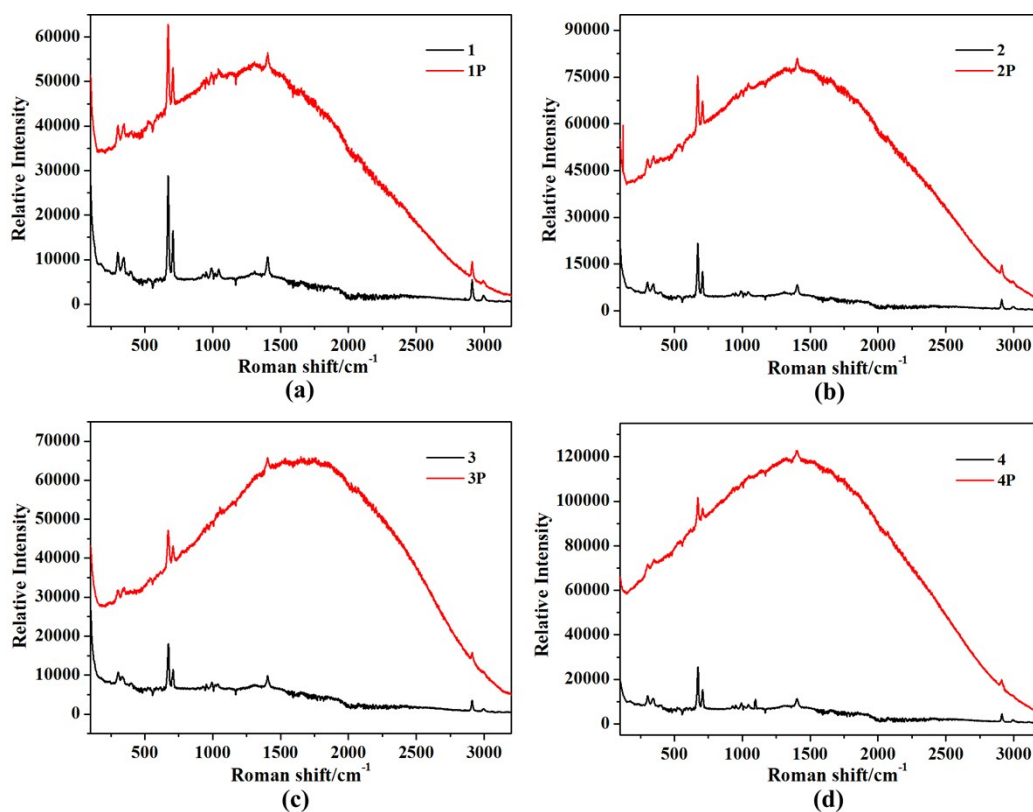

**Fig. S9** The SER spectra of **1**, **1P**, **2**, **2P**, **3**, **3P**, **4** and **4P**.

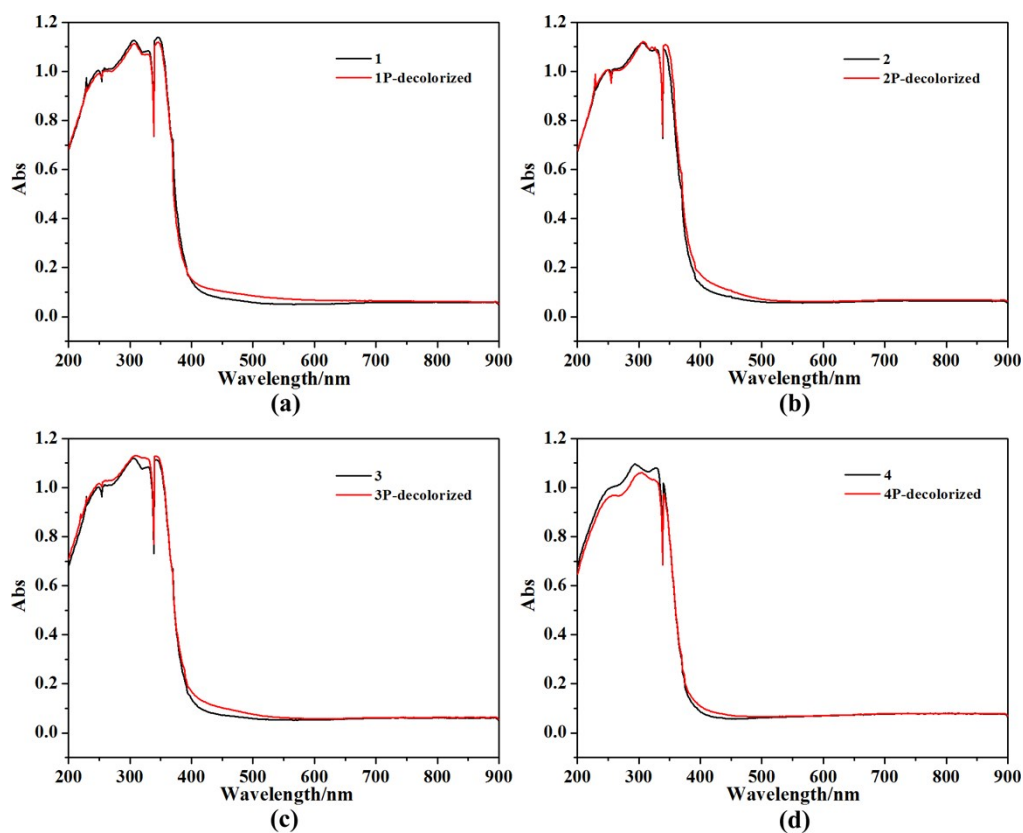

**Fig. S10** The comparison of UV-vis absorption spectra of **1**, **1P**-decolorized, **2**, **2P**-decolorized, **3**, **3P**-decolorized, **4** and **4P**-decolorized.

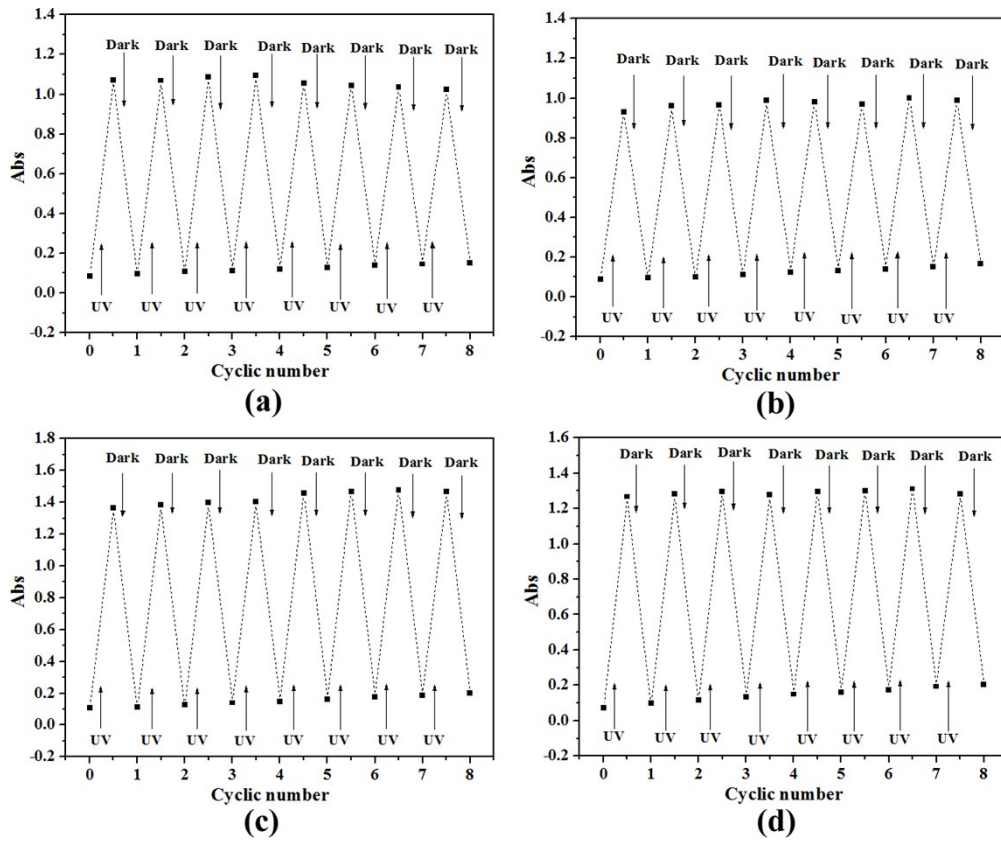

**Fig. S11** The switching cycles of coloration-decoloration processes of **1, 2, 3** and **4** upon alternating UV light irradiation and dark treatment.

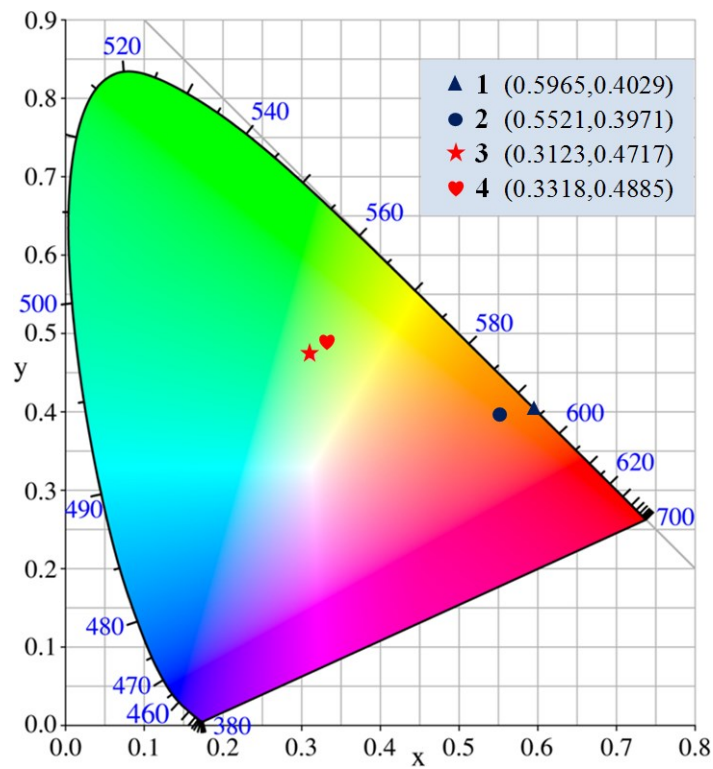

**Fig. S12** The CIE for **1, 2, 3** and **4**.



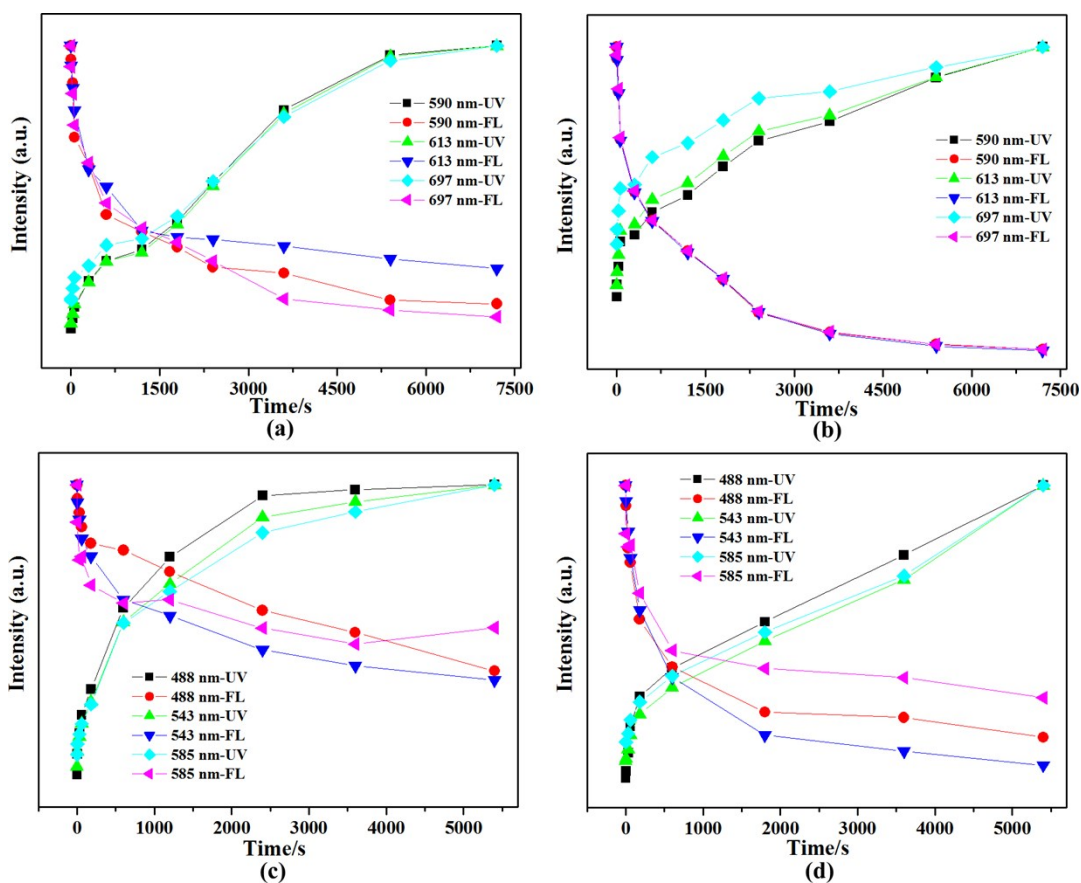

Fig. S13 The comparison of coloration rate and fluorescence quenching rate of 1 (a), 2 (b), 3 (c) and 4 (d).

### 3. Tables

**Table S1** Crystal data and structure refinement for compounds **1-4**.

| Compounds                                                                                    | <b>1</b>                                                                                                        | <b>2</b>                                                                                        |
|----------------------------------------------------------------------------------------------|-----------------------------------------------------------------------------------------------------------------|-------------------------------------------------------------------------------------------------|
| CCDC code                                                                                    | 1976991                                                                                                         | 1976992                                                                                         |
| Empirical formula                                                                            | C <sub>32</sub> H <sub>76</sub> Ag <sub>7</sub> Eu <sub>2</sub> I <sub>13</sub> O <sub>16</sub> S <sub>16</sub> | C <sub>16</sub> H <sub>48</sub> Ag <sub>7</sub> EuI <sub>10</sub> O <sub>8</sub> S <sub>8</sub> |
| Formula weight                                                                               | 3938.62                                                                                                         | 2801.07                                                                                         |
| Crystal size (mm)                                                                            | 0.20 × 0.09 × 0.08                                                                                              | 0.20 × 0.10 × 0.08                                                                              |
| Crystal system                                                                               | Monoclinic                                                                                                      | Monoclinic                                                                                      |
| Space group                                                                                  | <i>C2/c</i>                                                                                                     | <i>P2<sub>1</sub>/c</i>                                                                         |
| <i>a</i> (Å)                                                                                 | 43.352(7)                                                                                                       | 12.4723(4)                                                                                      |
| <i>b</i> (Å)                                                                                 | 12.991(2)                                                                                                       | 23.4245(10)                                                                                     |
| <i>c</i> (Å)                                                                                 | 18.555(3)                                                                                                       | 21.0231(8)                                                                                      |
| $\alpha$ (°)                                                                                 | 90                                                                                                              | 90                                                                                              |
| $\beta$ (°)                                                                                  | 101.839(4)                                                                                                      | 99.650(3)                                                                                       |
| $\gamma$ (°)                                                                                 | 90                                                                                                              | 90                                                                                              |
| Volume (Å <sup>3</sup> )                                                                     | 10228(3)                                                                                                        | 6055.1(4)                                                                                       |
| <i>Z</i>                                                                                     | 4                                                                                                               | 4                                                                                               |
| <i>D<sub>c</sub></i> (g cm <sup>-3</sup> )                                                   | 2.558                                                                                                           | 3.073                                                                                           |
| <i>F</i> (000)                                                                               | 7184                                                                                                            | 5032                                                                                            |
| $\mu$ (mm <sup>-1</sup> )                                                                    | 6.807                                                                                                           | 8.637                                                                                           |
| $\vartheta$ range (°)                                                                        | 2.24 to 28.35                                                                                                   | 2.91 to 25.00                                                                                   |
| Reflections collected                                                                        | 71499                                                                                                           | 26150                                                                                           |
| Unique reflections                                                                           | 12786                                                                                                           | 10646                                                                                           |
| <i>R</i> <sub>int</sub>                                                                      | 0.0470                                                                                                          | 0.0290                                                                                          |
| Goodness-of-fit on <i>F</i> <sup>2</sup>                                                     | 1.033                                                                                                           | 1.065                                                                                           |
| <i>R</i> <sub>1</sub> / <i>wR</i> <sub>2</sub> , [ <i>I</i> ≥ 2σ( <i>I</i> )] <sup>a,b</sup> | 0.0944 / 0.2588                                                                                                 | 0.0550 / 0.1309                                                                                 |
| <i>R</i> <sub>1</sub> / <i>wR</i> <sub>2</sub> , (all data)                                  | 0.1122 / 0.2740                                                                                                 | 0.0841 / 0.1423                                                                                 |
| $\Delta\rho_{\max}/\Delta\rho_{\min}$ (e Å <sup>-3</sup> )                                   | 4.493 / -5.850                                                                                                  | 3.994 / -1.677                                                                                  |

| Compounds                                                                                    | <b>3</b>                                                                                                        | <b>4</b>                                                                                        |
|----------------------------------------------------------------------------------------------|-----------------------------------------------------------------------------------------------------------------|-------------------------------------------------------------------------------------------------|
| CCDC code                                                                                    | 1976993                                                                                                         | 1976999                                                                                         |
| Empirical formula                                                                            | C <sub>32</sub> H <sub>92</sub> Ag <sub>7</sub> I <sub>13</sub> O <sub>16</sub> S <sub>16</sub> Tb <sub>2</sub> | C <sub>16</sub> H <sub>48</sub> Ag <sub>6</sub> I <sub>9</sub> O <sub>8</sub> S <sub>8</sub> Tb |
| Formula weight                                                                               | 3968.65                                                                                                         | 2573.26                                                                                         |
| Crystal size (mm)                                                                            | 0.20 × 0.09 × 0.08                                                                                              | 0.20 × 0.07 × 0.06                                                                              |
| Crystal system                                                                               | Monoclinic                                                                                                      | Monoclinic                                                                                      |
| Space group                                                                                  | <i>C2/c</i>                                                                                                     | <i>C2/c</i>                                                                                     |
| <i>a</i> (Å)                                                                                 | 43.485(16)                                                                                                      | 31.7458(16)                                                                                     |
| <i>b</i> (Å)                                                                                 | 13.005(5)                                                                                                       | 19.7768(11)                                                                                     |
| <i>c</i> (Å)                                                                                 | 18.690(7)                                                                                                       | 22.4989(10)                                                                                     |
| $\alpha$ (°)                                                                                 | 90                                                                                                              | 90                                                                                              |
| $\beta$ (°)                                                                                  | 102.214(10)                                                                                                     | 125.6640(10)                                                                                    |
| $\gamma$ (°)                                                                                 | 90                                                                                                              | 90                                                                                              |
| Volume (Å <sup>3</sup> )                                                                     | 10331(7)                                                                                                        | 11476.2(10)                                                                                     |
| <i>Z</i>                                                                                     | 4                                                                                                               | 8                                                                                               |
| <i>D</i> <sub>c</sub> (g cm <sup>-3</sup> )                                                  | 2.552                                                                                                           | 2.979                                                                                           |
| <i>F</i> (000)                                                                               | 7264                                                                                                            | 9280                                                                                            |
| $\mu$ (mm <sup>-1</sup> )                                                                    | 6.895                                                                                                           | 8.383                                                                                           |
| $\vartheta$ range (°)                                                                        | 2.25 to 25.00                                                                                                   | 2.20 to 28.38                                                                                   |
| Reflections collected                                                                        | 111386                                                                                                          | 84529                                                                                           |
| Unique reflections                                                                           | 8997                                                                                                            | 14307                                                                                           |
| <i>R</i> <sub>int</sub>                                                                      | 0.1095                                                                                                          | 0.0636                                                                                          |
| Goodness-of-fit on <i>F</i> <sup>2</sup>                                                     | 1.063                                                                                                           | 1.081                                                                                           |
| <i>R</i> <sub>1</sub> / <i>wR</i> <sub>2</sub> , [ <i>I</i> ≥ 2σ( <i>I</i> )] <sup>a,b</sup> | 0.1035 / 0.2720                                                                                                 | 0.0611 / 0.1442                                                                                 |
| <i>R</i> <sub>1</sub> / <i>wR</i> <sub>2</sub> , (all data)                                  | 0.1182 / 0.2900                                                                                                 | 0.0840 / 0.1543                                                                                 |
| $\Delta\rho_{\max}/\Delta\rho_{\min}$ (e Å <sup>-3</sup> )                                   | 3.311 / -3.731                                                                                                  | 3.585 / -3.526                                                                                  |

<sup>a</sup>  $R_1 = \sum ||F_o| - |F_c|| / \sum |F_o|$ , <sup>b</sup>  $wR_2 = [\sum w(F_o^2 - F_c^2)^2 / \sum w(F_o^2)^2]^{1/2}$

**Table S2** Selected bond lengths (Å) and angles (°) for compounds **1-4**.

| Compound 1          |            |                   |            |
|---------------------|------------|-------------------|------------|
| Ag(1)-I(2)          | 2.801(2)   | Ag(1)-I(4)        | 2.859(2)   |
| Ag(1)-I(3)          | 2.891(2)   | Ag(1)-I(1)        | 2.900(2)   |
| Ag(2)-I(2)#2        | 2.803(2)   | Ag(2)-I(3)        | 2.866(2)   |
| Ag(2)-I(1)#1        | 2.889(2)   | Ag(2)-I(4)        | 2.897(2)   |
| Ag(3)-I(5)          | 2.7240(19) | Ag(3)-I(6)        | 2.944(2)   |
| Ag(3)-I(7)#3        | 2.972(2)   | Ag(3)-I(7)        | 2.978(2)   |
| Ag(4)-I(4)          | 2.972(4)   | Ag(4)-I(1)        | 2.990(4)   |
| Ag(4)-I(3)#1        | 3.008(4)   | Ag(4)-I(1)#1      | 3.022(4)   |
| Eu(1)-O(6)          | 2.353(13)  | Eu(1)-O(2)        | 2.358(11)  |
| Eu(1)-O(1)          | 2.372(12)  | Eu(1)-O(4)        | 2.376(11)  |
| Eu(1)-O(3)          | 2.380(12)  | Eu(1)-O(5)        | 2.393(11)  |
| Eu(1)-O(7)          | 2.399(11)  | Eu(1)-O(8)        | 2.412(10)  |
| Ag(1)-Ag(2)         | 3.055(2)   | Ag(2)-Ag(4)       | 3.053(4)   |
| Ag(1)-Ag(4)         | 3.167(4)   | Ag(4)-Ag(4)#1     | 1.761(10)  |
| Ag(1)-Ag(4)#1       | 3.186(4)   | Ag(4)-Ag(2)#1     | 3.031(4)   |
| Ag(2)-Ag(4)#1       | 3.031(4)   | Ag(4)-Ag(1)#1     | 3.186(4)   |
| I(2)-Ag(1)-I(4)     | 115.92(7)  | I(5)-Ag(3)-I(6)   | 120.17(7)  |
| I(2)-Ag(1)-I(3)     | 108.81(7)  | I(5)-Ag(3)-I(7)#3 | 117.34(7)  |
| I(4)-Ag(1)-I(3)     | 116.10(7)  | I(6)-Ag(3)-I(7)#3 | 99.14(6)   |
| I(2)-Ag(1)-I(1)     | 109.75(7)  | I(5)-Ag(3)-I(7)   | 117.61(7)  |
| I(4)-Ag(1)-I(1)     | 102.19(7)  | I(6)-Ag(3)-I(7)   | 99.01(6)   |
| I(3)-Ag(1)-I(1)     | 102.90(7)  | I(7)#3-Ag(3)-I(7) | 99.70(7)   |
| I(2)#2-Ag(2)-I(3)   | 115.69(7)  | I(4)-Ag(4)-I(1)   | 97.49(11)  |
| I(2)#2-Ag(2)-I(1)#1 | 112.31(7)  | I(4)-Ag(4)-I(3)#1 | 117.16(16) |
| I(3)-Ag(2)-I(1)#1   | 106.11(7)  | I(1)-Ag(4)-I(3)#1 | 100.14(12) |

|                   |           |                     |            |
|-------------------|-----------|---------------------|------------|
| I(2)#2-Ag(2)-I(4) | 101.52(7) | I(4)-Ag(4)-I(1)#1   | 100.16(12) |
| I(3)-Ag(2)-I(4)   | 115.69(7) | I(1)-Ag(4)-I(1)#1   | 145.93(18) |
| I(1)#1-Ag(2)-I(4) | 105.21(7) | I(3)#1-Ag(4)-I(1)#1 | 97.37(11)  |
| O(6)-Eu(1)-O(2)   | 107.1(6)  | O(3)-Eu(1)-O(5)     | 73.6(5)    |
| O(6)-Eu(1)-O(1)   | 142.6(6)  | O(6)-Eu(1)-O(7)     | 76.9(6)    |
| O(2)-Eu(1)-O(1)   | 86.0(6)   | O(2)-Eu(1)-O(7)     | 144.2(5)   |
| O(6)-Eu(1)-O(4)   | 70.2(6)   | O(1)-Eu(1)-O(7)     | 72.9(6)    |
| O(2)-Eu(1)-O(4)   | 73.2(5)   | O(4)-Eu(1)-O(7)     | 137.4(6)   |
| O(1)-Eu(1)-O(4)   | 146.5(6)  | O(3)-Eu(1)-O(7)     | 120.6(6)   |
| O(6)-Eu(1)-O(3)   | 145.0(6)  | O(5)-Eu(1)-O(7)     | 73.3(5)    |
| O(2)-Eu(1)-O(3)   | 77.0(6)   | O(6)-Eu(1)-O(8)     | 75.3(5)    |
| O(1)-Eu(1)-O(3)   | 71.4(5)   | O(2)-Eu(1)-O(8)     | 73.2(4)    |
| O(4)-Eu(1)-O(3)   | 78.3(6)   | O(1)-Eu(1)-O(8)     | 75.4(4)    |
| O(6)-Eu(1)-O(5)   | 84.7(6)   | O(4)-Eu(1)-O(8)     | 120.9(4)   |
| O(2)-Eu(1)-O(5)   | 141.8(5)  | O(3)-Eu(1)-O(8)     | 136.4(5)   |
| O(1)-Eu(1)-O(5)   | 106.8(5)  | O(5)-Eu(1)-O(8)     | 144.4(5)   |
| O(4)-Eu(1)-O(5)   | 77.3(5)   | O(7)-Eu(1)-O(8)     | 73.7(4)    |

Symmetry code:

1: #1 -x+1/2,-y+3/2,-z #2 -x+1/2,y-1/2,-z+1/2 #3 -x+2,y,-z+3/2 #4 -x+1/2,y+1/2,-z+1/2

Compound 2

|              |            |              |            |
|--------------|------------|--------------|------------|
| Ag(1)-I(3)   | 2.7472(15) | Ag(4)-I(6)   | 2.9146(15) |
| Ag(1)-I(1)   | 2.9163(19) | Ag(4)-I(9)   | 2.9331(17) |
| Ag(1)-I(2)   | 2.9303(17) | Ag(5)-I(10)  | 2.7579(17) |
| Ag(1)-I(8)#1 | 2.9947(17) | Ag(5)-I(6)   | 2.8745(18) |
| Ag(2)-I(3)   | 2.7680(17) | Ag(5)-I(5)   | 2.8771(17) |
| Ag(2)-I(7)   | 2.7972(17) | Ag(5)-I(9)   | 2.9968(18) |
| Ag(2)-I(4)   | 2.8720(17) | Ag(6)-I(4)#2 | 2.8278(18) |
| Ag(2)-I(6)   | 2.9823(16) | Ag(6)-I(9)#2 | 2.8584(17) |
| Ag(3)-I(2)   | 2.7433(18) | Ag(6)-I(5)#2 | 2.8904(17) |
| Ag(3)-I(4)   | 2.8389(17) | Ag(6)-I(9)   | 2.9960(18) |

---

|                   |            |                  |            |
|-------------------|------------|------------------|------------|
| Ag(3)-I(6)        | 2.8911(17) | Ag(7)-I(10)      | 2.7132(16) |
| Ag(3)-I(5)        | 2.987(2)   | Ag(7)-I(1)#3     | 2.828(2)   |
| Ag(4)-I(7)        | 2.8111(17) | Ag(7)-I(8)       | 2.8458(18) |
| Ag(4)-I(8)        | 2.8255(16) | Eu(1)-O(8)       | 2.331(10)  |
| Eu(1)-O(4)        | 2.363(9)   | Eu(1)-O(6)       | 2.416(10)  |
| Eu(1)-O(7)        | 2.373(10)  | Eu(1)-O(5)       | 2.428(8)   |
| Eu(1)-O(1)        | 2.399(11)  | Eu(1)-O(3)       | 2.432(12)  |
| Eu(1)-O(2)        | 2.406(10)  |                  |            |
| Ag(1)-Ag(7)#1     | 2.9584(19) | Ag(5)-Ag(6)#2    | 3.093(2)   |
| Ag(2)-Ag(4)       | 3.1452(18) | Ag(6)-Ag(5)#2    | 3.093(2)   |
| Ag(3)-Ag(6)#2     | 3.365(2)   | Ag(6)-Ag(3)#2    | 3.365(2)   |
| Ag(4)-Ag(5)       | 3.3332(19) | Ag(7)-Ag(1)#3    | 2.9584(19) |
| I(3)-Ag(1)-I(1)   | 114.19(6)  | I(2)-Ag(3)-I(5)  | 114.79(6)  |
| I(3)-Ag(1)-I(2)   | 131.05(6)  | I(4)-Ag(3)-I(5)  | 101.90(6)  |
| I(1)-Ag(1)-I(2)   | 96.37(5)   | I(6)-Ag(3)-I(5)  | 102.57(6)  |
| I(3)-Ag(1)-I(8)#1 | 112.33(6)  | I(7)-Ag(4)-I(8)  | 112.89(5)  |
| I(1)-Ag(1)-I(8)#1 | 99.87(5)   | I(7)-Ag(4)-I(6)  | 112.51(5)  |
| I(2)-Ag(1)-I(8)#1 | 97.89(5)   | I(8)-Ag(4)-I(6)  | 94.82(5)   |
| I(3)-Ag(2)-I(7)   | 118.08(6)  | I(7)-Ag(4)-I(9)  | 107.70(5)  |
| I(3)-Ag(2)-I(4)   | 112.51(5)  | I(8)-Ag(4)-I(9)  | 120.05(6)  |
| I(7)-Ag(2)-I(4)   | 110.19(6)  | I(6)-Ag(4)-I(9)  | 108.28(5)  |
| I(3)-Ag(2)-I(6)   | 102.66(5)  | I(10)-Ag(5)-I(6) | 108.50(6)  |
| I(7)-Ag(2)-I(6)   | 110.90(5)  | I(10)-Ag(5)-I(5) | 118.24(6)  |
| I(4)-Ag(2)-I(6)   | 100.85(5)  | I(6)-Ag(5)-I(5)  | 105.78(5)  |
| I(2)-Ag(3)-I(4)   | 122.74(7)  | I(10)-Ag(5)-I(9) | 108.12(6)  |
| I(2)-Ag(3)-I(6)   | 108.68(6)  | I(6)-Ag(5)-I(9)  | 107.63(5)  |
| I(4)-Ag(3)-I(6)   | 103.92(5)  | I(5)-Ag(5)-I(9)  | 108.13(5)  |

---

|                     |           |                    |           |
|---------------------|-----------|--------------------|-----------|
| I(4)#2-Ag(6)-I(9)#2 | 121.19(6) | I(5)#2-Ag(6)-I(9)  | 106.77(6) |
| I(4)#2-Ag(6)-I(5)#2 | 104.63(6) | I(10)-Ag(7)-I(1)#3 | 124.05(7) |
| I(9)#2-Ag(6)-I(5)#2 | 111.66(5) | I(10)-Ag(7)-I(8)   | 126.93(7) |
| I(4)#2-Ag(6)-I(9)   | 110.46(5) | I(1)#3-Ag(7)-I(8)  | 105.75(5) |
| I(9)#2-Ag(6)-I(9)   | 101.47(5) | O(8)-Eu(1)-O(4)    | 100.0(4)  |
| O(8)-Eu(1)-O(7)     | 89.4(5)   | O(8)-Eu(1)-O(5)    | 148.3(4)  |
| O(4)-Eu(1)-O(7)     | 141.3(3)  | O(4)-Eu(1)-O(5)    | 76.3(3)   |
| O(8)-Eu(1)-O(1)     | 75.2(5)   | O(7)-Eu(1)-O(5)    | 76.3(3)   |
| O(4)-Eu(1)-O(1)     | 148.0(3)  | O(1)-Eu(1)-O(5)    | 124.0(4)  |
| O(7)-Eu(1)-O(1)     | 70.7(3)   | O(2)-Eu(1)-O(5)    | 131.5(4)  |
| O(8)-Eu(1)-O(2)     | 74.0(5)   | O(6)-Eu(1)-O(5)    | 76.2(4)   |
| O(4)-Eu(1)-O(2)     | 72.0(3)   | O(8)-Eu(1)-O(3)    | 139.3(5)  |
| O(7)-Eu(1)-O(2)     | 145.9(3)  | O(4)-Eu(1)-O(3)    | 89.2(4)   |
| O(1)-Eu(1)-O(2)     | 76.4(4)   | O(7)-Eu(1)-O(3)    | 107.8(4)  |
| O(8)-Eu(1)-O(6)     | 72.6(4)   | O(1)-Eu(1)-O(3)    | 76.4(4)   |
| O(4)-Eu(1)-O(6)     | 73.8(3)   | O(2)-Eu(1)-O(3)    | 71.4(5)   |
| O(7)-Eu(1)-O(6)     | 73.5(3)   | O(6)-Eu(1)-O(3)    | 147.0(4)  |
| O(1)-Eu(1)-O(6)     | 131.3(4)  | O(5)-Eu(1)-O(3)    | 72.4(4)   |
| O(2)-Eu(1)-O(6)     | 126.3(4)  |                    |           |

Symmetry code:

**2:** #1 x, -y+3/2, z-1/2    **#2** -x, -y+2, -z+1    **#3** x, -y+3/2, z+1/2

---

Compound 3

---

|              |          |              |          |
|--------------|----------|--------------|----------|
| Ag(1)-I(1)   | 2.810(2) | Ag(3)-I(4)   | 2.970(5) |
| Ag(1)-I(4)#1 | 2.875(3) | Ag(3)-I(3)#3 | 3.008(5) |
| Ag(1)-I(2)#1 | 2.910(3) | Ag(3)-I(3)   | 3.023(5) |
| Ag(1)-I(3)#2 | 2.913(3) | Ag(3)-I(2)#3 | 3.026(5) |
| Ag(2)-I(1)   | 2.819(2) | Ag(4)-I(7)   | 2.741(2) |
| Ag(2)-I(2)   | 2.881(3) | Ag(4)-I(5)   | 2.949(3) |
| Ag(2)-I(3)   | 2.906(3) | Ag(4)-I(6)   | 2.989(3) |
| Ag(2)-I(4)   | 2.914(3) | Ag(4)-I(6)#6 | 2.992(3) |

---

---

|                     |           |                     |            |
|---------------------|-----------|---------------------|------------|
| Tb(1)-O(3)          | 2.329(16) | Tb(1)-O(8)          | 2.380(12)  |
| Tb(1)-O(5)          | 2.364(14) | Tb(1)-O(6)          | 2.384(13)  |
| Tb(1)-O(1)          | 2.369(14) | Tb(1)-O(2)          | 2.388(13)  |
| Tb(1)-O(7)          | 2.370(11) | Tb(1)-O(4)          | 2.389(13)  |
| Ag(1)-Ag(2)#1       | 3.082(3)  | Ag(2)-Ag(1)#4       | 3.082(3)   |
| Ag(1)-Ag(3)#1       | 3.215(5)  | Ag(3)-Ag(3)#3       | 1.790(12)  |
| Ag(1)-Ag(3)#2       | 3.233(5)  | Ag(3)-Ag(2)#3       | 3.039(5)   |
| Ag(2)-Ag(3)#3       | 3.039(5)  | Ag(3)-Ag(1)#4       | 3.215(5)   |
| Ag(2)-Ag(3)         | 3.057(5)  | Ag(3)-Ag(1)#5       | 3.233(5)   |
| Ag(4)-Ag(4)#6       | 2.821(4)  |                     |            |
| I(1)-Ag(1)-I(4)#1   | 115.70(9) | I(4)-Ag(3)-I(3)#3   | 97.19(13)  |
| I(1)-Ag(1)-I(2)#1   | 109.03(8) | I(4)-Ag(3)-I(3)     | 100.67(13) |
| I(4)#1-Ag(1)-I(2)#1 | 115.84(9) | I(3)#3-Ag(3)-I(3)   | 145.5(2)   |
| I(1)-Ag(1)-I(3)#2   | 111.53(9) | I(4)-Ag(3)-I(2)#3   | 117.5(2)   |
| I(4)#1-Ag(1)-I(3)#2 | 101.54(8) | I(3)#3-Ag(3)-I(2)#3 | 100.65(13) |
| I(2)#1-Ag(1)-I(3)#2 | 102.08(8) | I(3)-Ag(3)-I(2)#3   | 96.93(12)  |
| I(1)-Ag(2)-I(2)     | 115.68(8) | I(7)-Ag(4)-I(5)     | 120.18(8)  |
| I(1)-Ag(2)-I(3)     | 111.73(9) | I(7)-Ag(4)-I(6)     | 117.23(9)  |
| I(2)-Ag(2)-I(3)     | 106.74(9) | I(5)-Ag(4)-I(6)     | 99.11(7)   |
| I(1)-Ag(2)-I(4)     | 101.86(8) | I(7)-Ag(4)-I(6)#6   | 117.47(9)  |
| I(2)-Ag(2)-I(4)     | 115.52(8) | I(5)-Ag(4)-I(6)#6   | 99.05(7)   |
| I(3)-Ag(2)-I(4)     | 104.90(8) | I(6)-Ag(4)-I(6)#6   | 99.99(8)   |
| O(3)-Tb(1)-O(5)     | 70.1(7)   | O(8)-Tb(1)-O(6)     | 70.2(5)    |
| O(3)-Tb(1)-O(1)     | 78.3(7)   | O(3)-Tb(1)-O(2)     | 75.5(8)    |
| O(5)-Tb(1)-O(1)     | 120.2(6)  | O(5)-Tb(1)-O(2)     | 138.0(5)   |
| O(3)-Tb(1)-O(7)     | 110.8(8)  | O(1)-Tb(1)-O(2)     | 73.8(5)    |
| O(5)-Tb(1)-O(7)     | 73.4(5)   | O(5)-Tb(1)-O(2)     | 138.0(5)   |

---



|                  |          |                 |          |
|------------------|----------|-----------------|----------|
| O(1)-Tb(1)-O(7)  | 72.5(5)  | O(1)-Tb(1)-O(2) | 73.8(5)  |
| O(3)-Tb(1)-O(8)  | 144.2(7) | O(7)-Tb(1)-O(2) | 143.3(5) |
| O(5)-Tb(1)-O(8)  | 145.1(6) | O(8)-Tb(1)-O(2) | 74.3(6)  |
| O(1)-Tb(1)-O(8)  | 75.3(6)  | O(6)-Tb(1)-O(2) | 120.8(6) |
| O(7)-Tb(1)-O(8)  | 83.6(6)  | O(3)-Tb(1)-O(4) | 82.5(8)  |
| O(3)-Tb(1)-O(6)  | 143.7(6) | O(5)-Tb(1)-O(4) | 78.0(5)  |
| O(5)-Tb(1)-O(6)v | 78.9(6)  | O(1)-Tb(1)-O(4) | 145.9(5) |
| O(1)-Tb(1)-O(6)  | 135.4(5) | O(7)-Tb(1)-O(4) | 141.3(5) |
| O(7)-Tb(1)-O(6)  | 76.4(5)  | O(8)-Tb(1)-O(4) | 107.0(6) |
| O(6)-Tb(1)-O(4)  | 73.0(6)  | O(2)-Tb(1)-O(4) | 74.3(6)  |

Symmetry code:

**3:** #1 -x+1/2,y+1/2,-z+1/2    #2 x,-y+1,z+1/2    #3 -x+1/2,-y+1/2,-z  
#4 -x+1/2,y-1/2,-z+1/2    #5 x,-y+1,z-1/2    #6 -x+2,y,-z+1/2

Compound 4

|              |            |            |            |
|--------------|------------|------------|------------|
| Ag(1)-I(1)   | 2.8106(13) | Ag(4)-I(7) | 2.7550(13) |
| Ag(1)-I(3)   | 2.8515(12) | Ag(4)-I(5) | 2.8792(13) |
| Ag(1)-I(2)   | 2.8724(13) | Ag(4)-I(4) | 2.8880(13) |
| Ag(1)-I(6)   | 2.9633(12) | Ag(4)-I(6) | 2.9276(13) |
| Ag(2)-I(1)#1 | 2.7708(13) | Ag(5)-I(8) | 2.8032(13) |
| Ag(2)-I(3)   | 2.8430(13) | Ag(5)-I(2) | 2.8373(12) |
| Ag(2)-I(6)   | 2.9217(13) | Ag(5)-I(5) | 2.8467(13) |
| Ag(2)-I(4)   | 3.0143(15) | Ag(5)-I(6) | 3.0023(14) |
| Ag(3)-I(9)#2 | 2.8267(15) | Ag(6)-I(7) | 2.7615(17) |
| Ag(3)-I(3)   | 2.8605(13) | Ag(6)-I(9) | 2.7655(18) |
| Ag(3)-I(5)   | 2.8907(14) | Ag(6)-I(8) | 2.7661(15) |
| Ag(3)-I(4)   | 2.9381(14) | Tb(1)-O(2) | 2.324(7)   |
| Tb(1)-O(6)   | 2.344(7)   | Tb(1)-O(4) | 2.392(8)   |
| Tb(1)-O(7)   | 2.362(7)   | Tb(1)-O(8) | 2.394(7)   |
| Tb(1)-O(3)   | 2.366(7)   | Tb(1)-O(1) | 2.401(7)   |
| Tb(1)-O(5)   | 2.373(7)   |            |            |

---

|                   |           |                 |           |
|-------------------|-----------|-----------------|-----------|
| I(1)-Ag(1)-I(3)   | 122.57(4) | I(5)-Ag(3)-I(4) | 102.81(4) |
| I(1)-Ag(1)-I(2)   | 106.02(4) | I(7)-Ag(4)-I(5) | 114.59(5) |
| I(3)-Ag(1)-I(2)   | 110.86(4) | I(7)-Ag(4)-I(4) | 104.98(4) |
| I(1)-Ag(1)-I(6)   | 104.95(4) | I(5)-Ag(4)-I(4) | 104.36(4) |
| I(3)-Ag(1)-I(6)   | 103.07(4) | I(7)-Ag(4)-I(6) | 106.98(4) |
| I(2)-Ag(1)-I(6)   | 108.58(4) | I(5)-Ag(4)-I(6) | 111.29(4) |
| I(1)#1-Ag(2)-I(3) | 120.74(5) | I(4)-Ag(4)-I(6) | 114.68(4) |
| I(1)#1-Ag(2)-I(6) | 112.58(4) | I(8)-Ag(5)-I(2) | 122.30(4) |
| I(3)-Ag(2)-I(6)   | 104.34(4) | I(8)-Ag(5)-I(5) | 115.37(5) |
| I(1)#1-Ag(2)-I(4) | 103.03(4) | I(2)-Ag(5)-I(5) | 101.53(4) |
| I(3)-Ag(2)-I(4)   | 104.73(4) | I(8)-Ag(5)-I(6) | 98.89(4)  |
| I(6)-Ag(2)-I(4)   | 111.13(4) | I(2)-Ag(5)-I(6) | 108.45(4) |
| I(9)#2-Ag(3)-I(3) | 113.22(4) | I(5)-Ag(5)-I(6) | 110.07(4) |
| I(9)#2-Ag(3)-I(5) | 107.02(5) | I(7)-Ag(6)-I(9) | 114.41(5) |
| I(3)-Ag(3)-I(5)   | 112.22(4) | I(7)-Ag(6)-I(8) | 115.23(6) |
| I(9)#2-Ag(3)-I(4) | 114.91(4) | I(9)-Ag(6)-I(8) | 128.31(6) |
| I(3)-Ag(3)-I(4)   | 106.28(4) | O(2)-Tb(1)-O(6) | 144.0(3)  |
| O(6)-Tb(1)-O(7)   | 82.1(3)   | O(3)-Tb(1)-O(4) | 76.5(3)   |
| O(2)-Tb(1)-O(3)   | 88.9(3)   | O(5)-Tb(1)-O(4) | 74.5(3)   |
| O(6)-Tb(1)-O(3)   | 143.1(3)  | O(2)-Tb(1)-O(8) | 73.4(3)   |
| O(7)-Tb(1)-O(3)   | 108.0(3)  | O(6)-Tb(1)-O(8) | 70.8(3)   |
| O(2)-Tb(1)-O(5)   | 144.0(3)  | O(7)-Tb(1)-O(8) | 75.2(2)   |
| O(6)-Tb(1)-O(5)   | 75.0(3)   | O(3)-Tb(1)-O(8) | 145.7(3)  |
| O(7)-Tb(1)-O(5)   | 71.9(3)   | O(5)-Tb(1)-O(8) | 135.0(3)  |
| O(3)-Tb(1)-O(5)   | 74.9(3)   | O(4)-Tb(1)-O(8) | 122.0(3)  |
| O(2)-Tb(1)-O(4)   | 70.5(3)   | O(2)-Tb(1)-O(1) | 74.3(3)   |
| O(6)-Tb(1)-O(4)   | 75.3(3)   | O(6)-Tb(1)-O(1) | 143.7(3)  |
| O(7)-Tb(1)-O(4)   | 143.3(3)  | O(7)-Tb(1)-O(1) | 80.6(3)   |

---

---

|                                     |                   |                   |          |
|-------------------------------------|-------------------|-------------------|----------|
| O(3)-Tb(1)-O(1)                     | 73.0(3)           | O(4)-Tb(1)-O(1)   | 133.2(3) |
| O(5)-Tb(1)-O(1)                     | 128.0(3)          | O(8)-Tb(1)-O(1)   | 74.0(3)  |
| Symmetry code:                      |                   |                   |          |
| <b>4:</b> #1 $-x+3/2, -y+1/2, -z+1$ | #2 $x, -y, z+1/2$ | #3 $x, -y, z-1/2$ |          |

---

**Table S3** Synthesis conditions for compounds **1**, **2**, **3** and **4**.

| Entry | Lanthanide nitrate (mmol) | AgI (mmol) | KI (mmol) | DMSO (mL) | Ag/I | Products              |
|-------|---------------------------|------------|-----------|-----------|------|-----------------------|
| 1     | 0.25                      | 0.5        | 1.5       | 4         | 1:4  | <b>1</b>              |
| 2     | 0.25                      | 0.5        | 1.0       | 4         | 1:3  | <b>1</b> and <b>2</b> |
| 3     | 0.25                      | 2.0        | 2.0       | 4         | 1:2  | <b>2</b>              |
| 4     | 0.25                      | 0.5        | 1.5       | 4         | 1:4  | <b>3</b>              |
| 5     | 0.25                      | 0.5        | 1.0       | 4         | 1:3  | <b>3</b> and <b>4</b> |
| 6     | 0.25                      | 3.0        | 3.0       | 4         | 1:2  | <b>4</b>              |
